# Supplementary material for: Prescription practices in the treatment of agitation in newly hospitalized Chinese schizophrenia patients: data from a non-interventional naturalistic study
Source: Springer Nature journal article supplement (doi:10.1186/s12888-019-2192-6), 2019-07-10

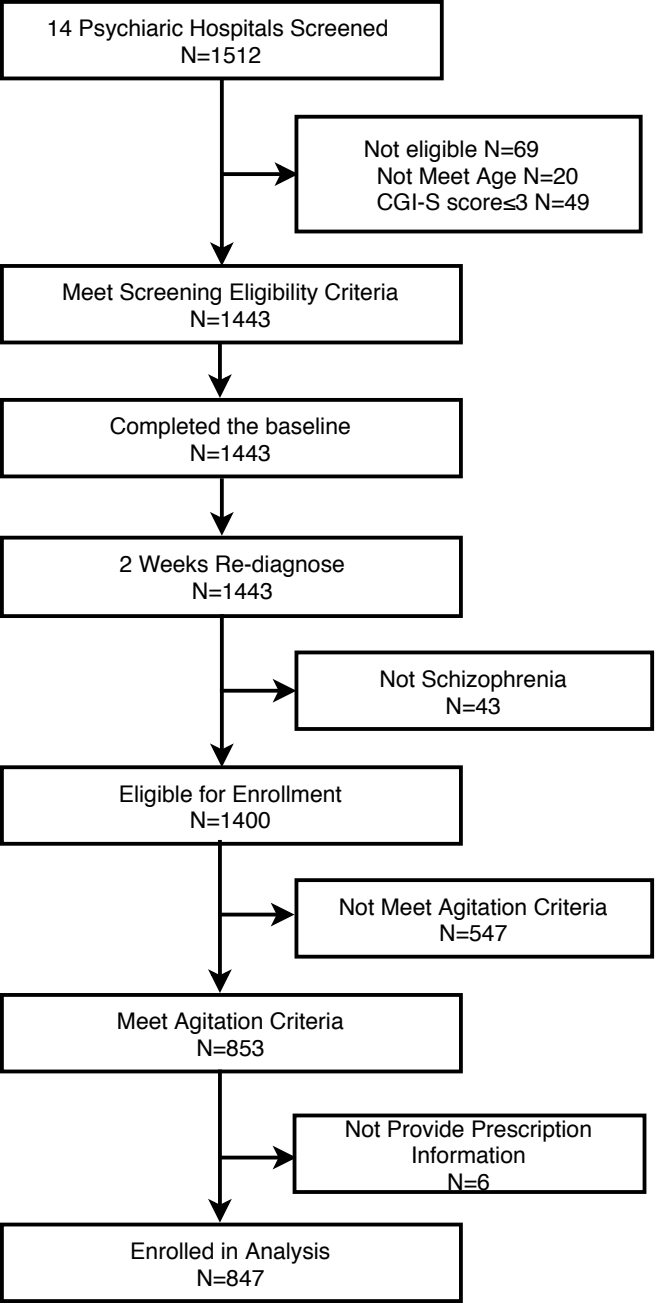

Supplement: MOESM1 [file 16917370]
